# Supplementary material for: A Novel Protocol to Monitor Trace Levels of Selected Polycyclic Aromatic Hydrocarbons in Environmental Water Using Fabric Phase Sorptive Extraction Followed by High Performance Liquid Chromatography-Fluorescence Detection
Source: Preprints.org preprint supplement (doi:10.20944/preprints201703.0176.v1), 2017-03-22
Supplement: Supplementary file 1 [file supplementary]

**SUPPLEMENTARY FIGURE CAPTIONS**

**Supplementary Figure A1.** Effect of eluent solvent volume: Extraction conditions: sample volume, 15 mL; extraction time: 30 min; eluent solvent: acetonitrile; sonication desorption time 5 min.

**Supplementary Figure A2**. Effect of salt concentration: Extraction conditions: sample volume, 15 mL; extraction time: 30 min; eluent solvent, acetonitrile; volume of elution solvent, 300 µL desorption time, 5 min.

**Supplementary Figure A3.** Effect of organic modifier volume: Extraction conditions: sample volume, 15 mL; extraction time: 30 min; eluent solvent, acetonitrile; volume of elution solvent, 300 µL desorption time, 5 min.

**Supplementary Figure A4.** Regeneration and reusability of sol-gel C18 coated FPSE media. Extraction conditions: sample volume, 15 mL; extraction time: 30 min; eluent solvent: acetonitrile; volume of elution solvent: 300 µL desorption time, 5 min.

**Supplementary Figure A1.**

**Supplementary Figure A2.**

**Supplementary Figure A3.**

**Supplementary Figure A4.**
